# Supplementary material
Source: PubMed Central journal article supplement (PMC3641388)
Supplement: ejhg2012258x1.pdf [file ejhg2012258x1.pdf]

## SUPPLEMENTAL MATERIAL

### Supplemental Text

#### **Procedure for reporting ancestry in the PMRP**

Participants in the PMRP filled out a questionnaire. The question related to ancestry was: “How would you describe your ancestry or ethnic origin? (You may list more than one if applicable.)” Participants were given the following options: Czech, Dutch, English, French/French-Canadian, German, Irish, Norwegian, Swedish, and Other. The listed nationalities were based on frequency of the prevalence of these groups in the sampled locations in recent census data<sup>11</sup>.

#### **MS command to simulate a "continent" of source populations**

We used MS embedded in MARKSIM to produce simulated SNP chip data for a hypothetical source continent. The continent comprises five populations, from which we sampled 200 individuals each. We used the following MS command in the MARKSIM *params* file:

```
./ms 1000 1 -t 1 -I 5 200 200 200 200 200 -ma x 225 185 160 140 225 x 190 170 155 185 195 x  
195 175 160 175 195 x 210 140 155 175 210 x -T >ms_outfile
```

#### **Swiss Ancestry and SVM performance**

Note that all Swiss individuals were grouped together in the West region despite the fact that German (Central region) and Italian (Mediterranean region) ancestry is present in Switzerland. We found that removing Swiss individuals or placing them in another region decreased SVM model performance.

## Supplemental Tables

**Table S1.** Datasets used in this study.

| <b>Dataset</b>                   | <b>Number of individuals</b>        | <b>Notes</b>                                                                                                                                             | <b>Applications</b>                                                                                                                                                            |
|----------------------------------|-------------------------------------|----------------------------------------------------------------------------------------------------------------------------------------------------------|--------------------------------------------------------------------------------------------------------------------------------------------------------------------------------|
| PMRP <sub>unabridged</sub>       | 3,903 (2,009 insular, 1894 admixed) |                                                                                                                                                          | projected set in projection PCA                                                                                                                                                |
| PMRP <sub>abridged</sub>         | 2,001 (544 insular, 1457 admixed)   | compared to PMRP <sub>unabridged</sub> , 847 individuals reporting insular German ancestry and 1,055 close relatives were removed                        | included in combined PCA                                                                                                                                                       |
| PMRP <sub>insular</sub>          | 2,009 (2,009 insular)               | compared to PMRP <sub>unabridged</sub> , 1,894 individuals reporting admixed ancestry were removed                                                       | tested self-reports of this set using SVM <sub>projection</sub> ; estimate F <sub>ST</sub> and genetic-geographic correlation                                                  |
| PMRP <sub>insular-abridged</sub> | 544 (544 insular)                   | compared to PMRP <sub>abridged</sub> , 1,455 individuals reporting admixed ancestry were removed                                                         | tested self-reports of this set using SVM <sub>combined</sub>                                                                                                                  |
| POPRES <sub>europe</sub>         | 1,247 (1,247 insular)               | compared to the original POPRES sample of Europeans, randomly removed 702 individuals sampled from England and 1300 individuals sampled from Switzerland | training data for SVM <sub>combined</sub> and SVM <sub>projection</sub> ; included in combined and projection PCA; estimate F <sub>ST</sub> and genetic-geographic correlation |

**Table S2.** Immigration schedule: number of immigrants from each source population each generation.

| Generation | # pop A | # pop B | # pop C | # pop D | # pop E |
|------------|---------|---------|---------|---------|---------|
| 0          | 400     | 200     | 200     | 150     | 50      |
| 1          | 200     | 100     | 100     | 50      | 25      |
| 2          | 100     | 50      | 50      | 25      | 10      |
| 3          | 50      | 20      | 20      | 10      | 5       |
| 4          | 25      | 10      | 10      | 2       | 2       |
| 5          | 10      | 5       | 5       | 2       | 2       |
| >=6        | 2       | 2       | 2       | 2       | 2       |

**Table S3.** Results from fitting training data to SVM models from combined and projection PCA and  $\eta = 0.1$  or  $0.4$ . *fitted MC rate* is misclassification error observed in the fitted training data shown in the table. *est. fitted rate* is misclassification error estimated from 10-fold cross-validation.

(a)

**COMBINED,  $\nu = 0.1$**

|                       | central | british isles | mediterranea | northeast | iberia | scandinavia | southeast | western |
|-----------------------|---------|---------------|--------------|-----------|--------|-------------|-----------|---------|
| central               | 42      | 2             | 0            | 2         | 0      | 2           | 0         | 4       |
| british isles         | 18      | 228           | 0            | 0         | 0      | 1           | 0         | 7       |
| mediterranea          | 0       | 0             | 176          | 0         | 1      | 0           | 0         | 1       |
| northeast             | 2       | 0             | 0            | 34        | 0      | 0           | 1         | 0       |
| iberia                | 0       | 0             | 4            | 0         | 237    | 0           | 0         | 4       |
| scandinavia           | 1       | 0             | 0            | 0         | 0      | 5           | 0         | 0       |
| southeast             | 0       | 0             | 1            | 5         | 0      | 0           | 48        | 0       |
| western               | 23      | 7             | 1            | 0         | 1      | 0           | 0         | 241     |
| <i>n</i>              | 86      | 237           | 182          | 41        | 239    | 8           | 49        | 257     |
| <i>fitted MC rate</i> | 0.500   | 0.038         | 0.033        | 0.171     | 0.008  | 0.375       | 0.020     | 0.062   |
| <i>est. MC rate</i>   | 0.491   | 0.036         | 0.041        | 0.229     | 0.012  | 0.500       | 0.095     | 0.071   |

(b)

**COMBINED,  $\nu = 0.2$**

|                       | central | british isles | mediterranea | northeast | iberia | scandinavia | southeast | western |
|-----------------------|---------|---------------|--------------|-----------|--------|-------------|-----------|---------|
| central               | 39      | 1             | 0            | 2         | 0      | 2           | 0         | 2       |
| british isles         | 15      | 207           | 0            | 0         | 0      | 0           | 0         | 4       |
| mediterranea          | 0       | 0             | 158          | 0         | 0      | 0           | 0         | 0       |
| northeast             | 1       | 0             | 0            | 32        | 0      | 0           | 2         | 0       |
| iberia                | 0       | 0             | 2            | 0         | 213    | 0           | 0         | 0       |
| scandinavia           | 2       | 1             | 0            | 0         | 0      | 10          | 0         | 0       |
| southeast             | 0       | 0             | 1            | 3         | 0      | 0           | 39        | 0       |
| western               | 19      | 207           | 0            | 0         | 0      | 0           | 0         | 222     |
| <i>n</i>              | 76      | 211           | 161          | 37        | 212    | 12          | 41        | 228     |
| <i>fitted MC rate</i> | 0.49    | 0.02          | 0.02         | 0.14      | 0      | 0.17        | 0.05      | 0.03    |
| <i>est. MC rate</i>   | 0.45    | 0.02          | 0.02         | 0.15      | 0      | 0.35        | 0.03      | 0.04    |

(c)

**COMBINED, nu = 0.4**

|                       | central | british isles | mediterranea | northeast | iberia | scandinavia | southeast | western |     |
|-----------------------|---------|---------------|--------------|-----------|--------|-------------|-----------|---------|-----|
| central               | 36      | 0             | 0            | 0         | 0      | 0           | 2         | 0       | 1   |
| british isles         | 9       | 157           | 0            | 0         | 0      | 0           | 0         | 0       | 0   |
| mediterranea          | 0       | 0             | 121          | 0         | 0      | 0           | 0         | 0       | 0   |
| northeast             | 0       | 0             | 0            | 28        | 0      | 0           | 0         | 0       | 0   |
| iberia                | 0       | 0             | 0            | 0         | 159    | 0           | 0         | 0       | 0   |
| scandinavia           | 0       | 0             | 0            | 0         | 0      | 4           | 0         | 0       | 0   |
| southeast             | 0       | 0             | 0            | 0         | 0      | 0           | 33        | 0       | 0   |
| western               | 13      | 0             | 0            | 0         | 0      | 0           | 0         | 0       | 170 |
| <i>n</i>              | 58      | 157           | 121          | 28        | 159    | 6           | 33        | 171     |     |
| <i>fitted MC rate</i> | 0.379   | 0.000         | 0.000        | 0.000     | 0.000  | 0.333       | 0.000     | 0.006   |     |
| <i>est. MC rate</i>   | 0.372   | 0.000         | 0.006        | 0.000     | 0.000  | 0.500       | 0.017     | 0.004   |     |

(d)

**PROJECTION, nu = 0.1**

|                       | central | british isles | mediterranea | northeast | iberia | scandinavia | southeast | western |
|-----------------------|---------|---------------|--------------|-----------|--------|-------------|-----------|---------|
| central               | 51      | 0             | 0            | 2         | 0      | 5           | 0         | 4       |
| british isles         | 16      | 231           | 0            | 0         | 0      | 1           | 0         | 6       |
| mediterranea          | 0       | 0             | 177          | 0         | 0      | 0           | 0         | 1       |
| northeast             | 2       | 0             | 0            | 35        | 0      | 0           | 3         | 0       |
| iberia                | 0       | 0             | 0            | 0         | 234    | 0           | 0         | 0       |
| scandinavia           | 0       | 0             | 0            | 0         | 0      | 5           | 0         | 0       |
| southeast             | 0       | 0             | 0            | 6         | 0      | 0           | 51        | 0       |
| western               | 15      | 5             | 2            | 0         | 0      | 0           | 0         | 247     |
| <i>n</i>              | 84      | 236           | 179          | 43        | 234    | 11          | 54        | 258     |
| <i>fitted MC rate</i> | 0.393   | 0.021         | 0.011        | 0.186     | 0.000  | 0.545       | 0.056     | 0.043   |
| <i>est. MC rate</i>   | 0.443   | 0.033         | 0.010        | 0.272     | 0.000  | 0.667       | 0.070     | 0.048   |

(e)

**PROJECTION, nu = 0.2**

|                       | central | british isles | mediterranea | northeast | iberia | scandinavia | southeast | western |
|-----------------------|---------|---------------|--------------|-----------|--------|-------------|-----------|---------|
| central               | 54      | 0             | 0            | 1         | 0      | 5           | 0         | 2       |
| british isles         | 10      | 207           | 0            | 0         | 0      | 0           | 0         | 0       |
| mediterranea          | 0       | 0             | 159          | 0         | 0      | 0           | 0         | 0       |
| northeast             | 0       | 0             | 0            | 32        | 0      | 0           | 3         | 0       |
| iberia                | 0       | 0             | 0            | 0         | 208    | 0           | 0         | 0       |
| scandinavia           | 0       | 0             | 0            | 0         | 0      | 6           | 0         | 0       |
| southeast             | 0       | 0             | 0            | 5         | 0      | 0           | 44        | 0       |
| western               | 10      | 3             | 0            | 0         | 0      | 0           | 0         | 227     |
| <i>n</i>              | 74      | 210           | 159          | 38        | 208    | 11          | 47        | 229     |
| <i>fitted MC rate</i> | 0.27    | 0.01          | 0            | 0.16      | 0      | 0.46        | 0.06      | 0.01    |
| <i>est. MC rate</i>   | 0.29    | 0.02          | 0            | 0.22      | 0      | 0.78        | 0.06      | 0.01    |

(f)

**PROJECTION, nu = 0.4**

|                       | central | british isles | mediterranea | northeast | iberia | scandinavia | southeast | western |
|-----------------------|---------|---------------|--------------|-----------|--------|-------------|-----------|---------|
| central               | 52      | 0             | 0            | 0         | 0      | 0           | 2         | 0       |
| british isles         | 3       | 157           | 0            | 0         | 0      | 0           | 0         | 0       |
| mediterranea          | 0       | 0             | 119          | 0         | 0      | 0           | 0         | 0       |
| northeast             | 0       | 0             | 0            | 27        | 0      | 0           | 0         | 1       |
| iberia                | 0       | 0             | 0            | 0         | 156    | 0           | 0         | 0       |
| scandinavia           | 0       | 0             | 0            | 0         | 0      | 5           | 0         | 0       |
| southeast             | 0       | 0             | 0            | 0         | 0      | 0           | 35        | 0       |
| western               | 0       | 0             | 0            | 0         | 0      | 0           | 0         | 171     |
| <i>n</i>              | 55      | 157           | 119          | 27        | 156    | 7           | 36        | 171     |
| <i>fitted MC rate</i> | 0.055   | 0.000         | 0.000        | 0.000     | 0.000  | 0.286       | 0.028     | 0.000   |
| <i>est. MC rate</i>   | 0.067   | 0.000         | 0.000        | 0.056     | 0.000  | 0.333       | 0.050     | 0.000   |

**Table S4.** Wisconsin ancestry prediction from projection and combined PCA and  $\eta = 0.1$  or  $0.4$ . Misreported is the fraction of  $n$  estimated to be misreports after correction for the MCE of the model. Results for  $\eta = 0.2$  are in Table 1 of the main text.

(a)

**COMBINED,  $\eta = 0.1$**

|               | Czech      | Dutch      | English    | French  | German     | Irish      | Norwegian  | Polish     | Swedish    |
|---------------|------------|------------|------------|---------|------------|------------|------------|------------|------------|
| central       | 8          | 4          | 12         | 3       | 162        | 1          | 2          | 5          | 2          |
| british isles | 0          | 11         | 63         | 5       | 6          | 29         | 14         | 0          | 1          |
| mediterranean | 0          | 0          | 0          | 0       | 0          | 0          | 0          | 0          | 0          |
| northeast     | 21         | 1          | 3          | 2       | 9          | 0          | 0          | 80         | 0          |
| iberia        | 0          | 0          | 0          | 1       | 0          | 0          | 0          | 0          | 0          |
| scandinavia   | 0          | 4          | 1          | 0       | 9          | 0          | 43         | 0          | 18         |
| southeast     | 0          | 0          | 0          | 0       | 0          | 0          | 0          | 0          | 0          |
| western       | 0          | 2          | 2          | 9       | 12         | 0          | 1          | 0          | 0          |
| $n$           | 29         | 22         | 81         | 20      | 198        | 30         | 60         | 85         | 21         |
| $mri$         | 8          | 18         | 18         | 11      | 36         | 1          | 17         | 5          | 3          |
| $MCE$         | 0.229      | 0.491      | 0.036      | 0.071   | 0.491      | 0.036      | 0.5        | 0.229      | 0.5        |
| $mri(corr)$   | 6.168      | 9.162      | 17.352     | 10.219  | 18.324     | 0.964      | 8.5        | 3.855      | 1.5        |
| misreported   | 0.21268966 | 0.41645455 | 0.21422222 | 0.51095 | 0.09254545 | 0.03213333 | 0.14166667 | 0.04535294 | 0.07142857 |

(b)

**COMBINED,  $\eta = 0.4$**

|               | Czech      | Dutch      | English    | French | German     | Irish      | Norwegian  | Polish     | Swedish    |
|---------------|------------|------------|------------|--------|------------|------------|------------|------------|------------|
| central       | 3          | 5          | 15         | 4      | 148        | 2          | 3          | 2          | 2          |
| british isles | 0          | 11         | 58         | 6      | 4          | 28         | 6          | 0          | 1          |
| mediterranean | 0          | 0          | 0          | 0      | 0          | 0          | 0          | 0          | 0          |
| northeast     | 25         | 1          | 4          | 2      | 27         | 0          | 0          | 83         | 0          |
| iberia        | 0          | 0          | 0          | 1      | 0          | 0          | 0          | 0          | 0          |
| scandinavia   | 1          | 5          | 3          | 0      | 13         | 0          | 50         | 0          | 18         |
| southeast     | 0          | 0          | 0          | 0      | 0          | 0          | 0          | 0          | 0          |
| western       | 0          | 0          | 1          | 7      | 6          | 0          | 1          | 0          | 0          |
| $n$           | 29         | 22         | 81         | 20     | 198        | 30         | 60         | 85         | 21         |
| $mri$         | 4          | 17         | 23         | 13     | 50         | 2          | 10         | 2          | 3          |
| $MCE$         | 0          | 0.372      | 0          | 0.004  | 0.372      | 0          | 0.5        | 0          | 0.5        |
| $mri(corr)$   | 4          | 10.676     | 23         | 12.948 | 31.4       | 2          | 5          | 2          | 1.5        |
| misreported   | 0.13793103 | 0.48527273 | 0.28395062 | 0.6474 | 0.15858586 | 0.06666667 | 0.08333333 | 0.02352941 | 0.07142857 |

(c)

**PROJECTION, nu=0.1**

|                  | Czech      | Dutch   | English | French     | German     | Irish      | Norwegian | Polish     | Swedish    |
|------------------|------------|---------|---------|------------|------------|------------|-----------|------------|------------|
| central          | 14         | 13      | 23      | 2          | 992        | 4          | 37        | 10         | 15         |
| british isles    | 1          | 10      | 67      | 8          | 159        | 39         | 34        | 0          | 9          |
| mediterranean    | 0          | 0       | 0       | 1          | 1          | 0          | 0         | 2          | 0          |
| northeast        | 22         | 0       | 4       | 0          | 143        | 0          | 0         | 102        | 1          |
| iberia           | 0          | 0       | 0       | 0          | 0          | 0          | 0         | 0          | 0          |
| scandinavia      | 0          | 0       | 1       | 0          | 25         | 0          | 8         | 1          | 1          |
| southeast        | 1          | 0       | 0       | 0          | 3          | 0          | 0         | 0          | 0          |
| western          | 0          | 2       | 5       | 12         | 235        | 1          | 1         | 0          | 0          |
| <i>n</i>         | 38         | 25      | 100     | 23         | 1558       | 44         | 80        | 115        | 26         |
| <i>mri</i>       | 16         | 12      | 33      | 11         | 566        | 5          | 72        | 13         | 25         |
| <i>MCE</i>       | 0.272      | 0.443   | 0.033   | 0.048      | 0.443      | 0.033      | 0.667     | 0.272      | 0.667      |
| <i>mri(corr)</i> | 11.648     | 6.684   | 31.911  | 10.472     | 315.262    | 4.835      | 23.976    | 9.464      | 8.325      |
| misreported      | 0.30652632 | 0.26736 | 0.31911 | 0.45530435 | 0.20235045 | 0.10988636 | 0.2997    | 0.08229565 | 0.32019231 |

(d)

**PROJECTION, nu =0.4**

|                  | Czech      | Dutch   | English | French     | German     | Irish      | Norwegian | Polish     | Swedish    |
|------------------|------------|---------|---------|------------|------------|------------|-----------|------------|------------|
| central          | 14         | 16      | 38      | 7          | 1059       | 7          | 17        | 5          | 6          |
| british isles    | 1          | 5       | 56      | 6          | 81         | 37         | 20        | 0          | 5          |
| mediterranean    | 0          | 0       | 0       | 0          | 1          | 0          | 0         | 0          | 0          |
| northeast        | 23         | 1       | 4       | 0          | 175        | 0          | 0         | 105        | 1          |
| iberia           | 0          | 0       | 0       | 0          | 0          | 0          | 0         | 0          | 0          |
| scandinavia      | 0          | 3       | 1       | 0          | 132        | 0          | 43        | 5          | 14         |
| southeast        | 0          | 0       | 0       | 0          | 0          | 0          | 0         | 0          | 0          |
| western          | 0          | 0       | 1       | 10         | 110        | 0          | 0         | 0          | 0          |
| <i>n</i>         | 38         | 25      | 100     | 23         | 1558       | 44         | 80        | 115        | 26         |
| <i>mri</i>       | 15         | 9       | 44      | 13         | 499        | 7          | 37        | 10         | 12         |
| <i>MCE</i>       | 0.056      | 0.067   | 0       | 0          | 0.067      | 0          | 0.333     | 0.056      | 0.333      |
| <i>mri(corr)</i> | 14.16      | 8.397   | 44      | 13         | 465.567    | 7          | 24.679    | 9.44       | 8.004      |
| misreported      | 0.37263158 | 0.33588 | 0.44    | 0.56521739 | 0.29882349 | 0.15909091 | 0.3084875 | 0.08208696 | 0.30784615 |

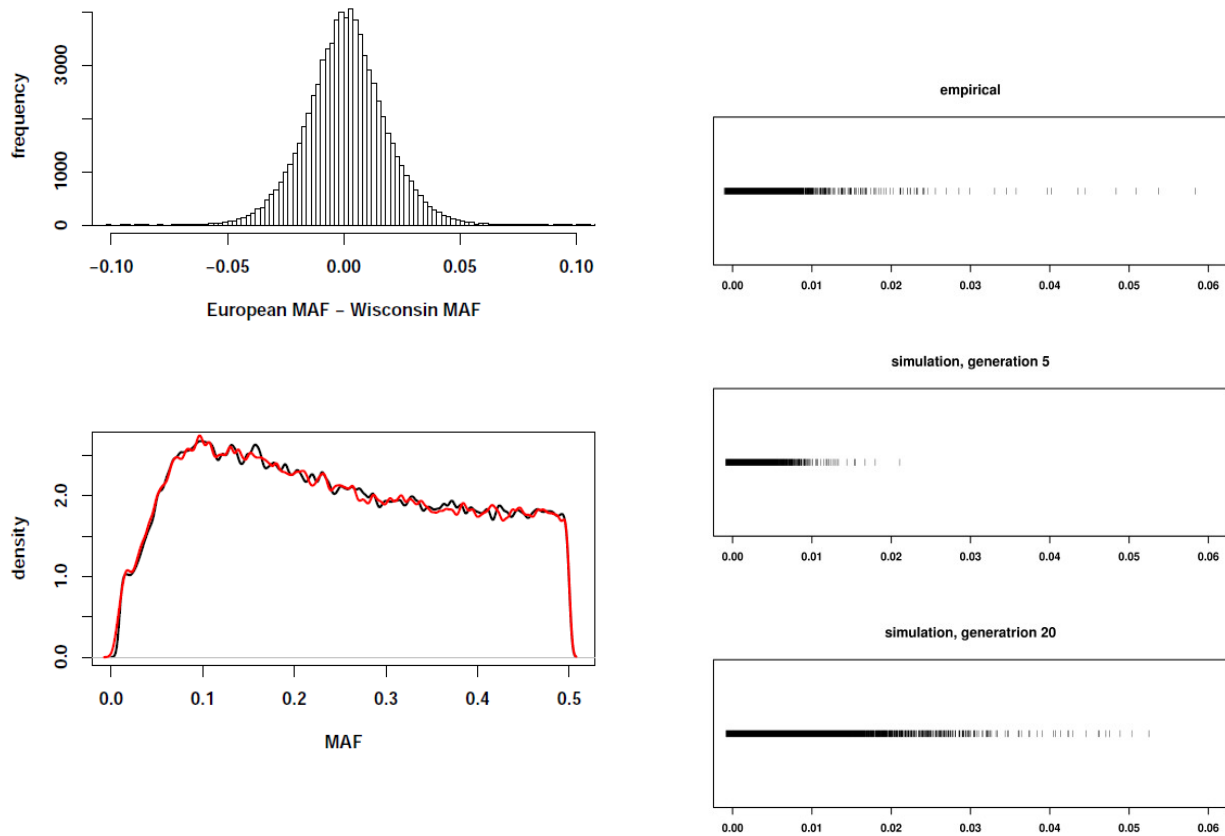

**Figure S1.** Upper left-hand panel shows the distribution of the European minor allele frequency (MAF) less the Wisconsin MAF for all 75,293 SNPs used in the analyses. Note the symmetrical distribution as well as the absence of extreme values. Lower left-hand panel shows the density estimate of MAFs for the PRMP (red) and POPRES (black) datasets at all 75,293 SNPs. Note the high similarity and obvious ascertainment bias towards high-frequency variants. Upper right-hand panel shows the distribution of single-SNP  $F_{ST}$  values for all 75,293 SNPs. Note the lack of extreme value SNPs. Eight SNPs with  $F_{ST} > 0.1$  were not included in analyses. Middle and lower right-hand panels show the distribution of  $F_{ST}$  values in simulations at 5 and 20 generations post-colonization. Note that the empirical distribution is somewhere in between these two simulated distributions.



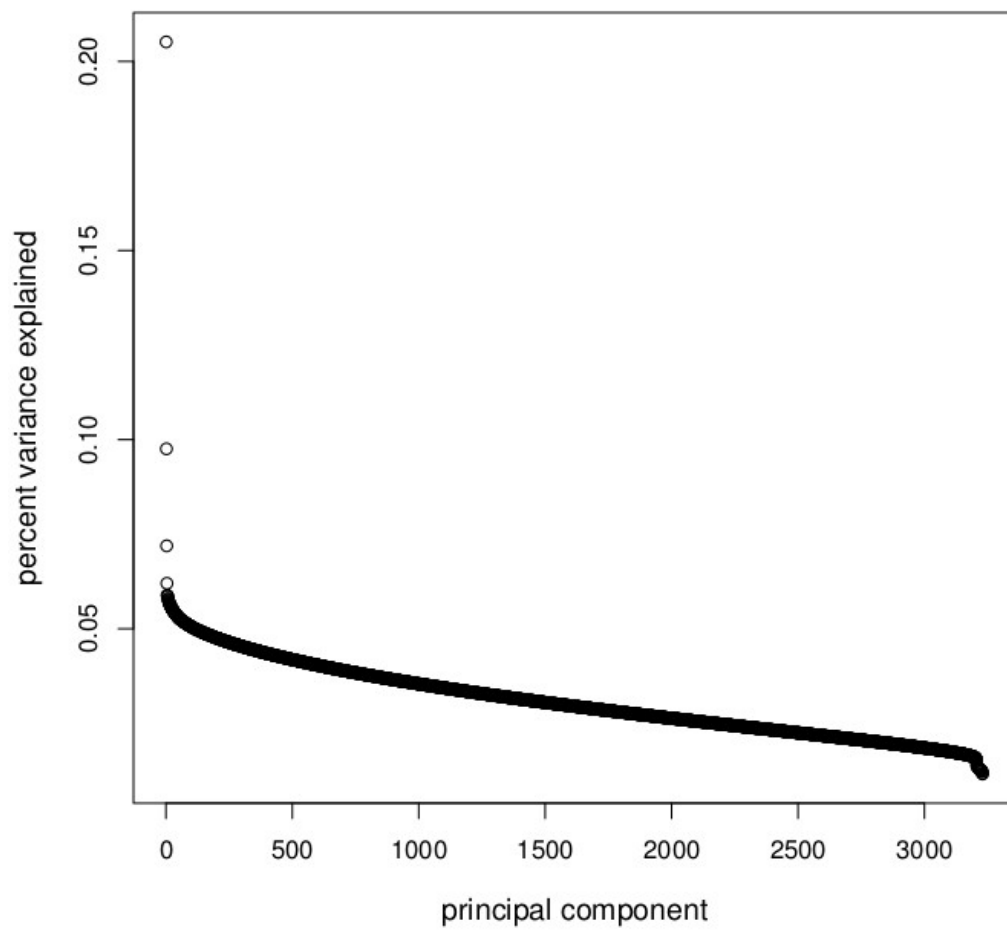

**Figure S2.** Percent variance explained by each PC under combined PCA.

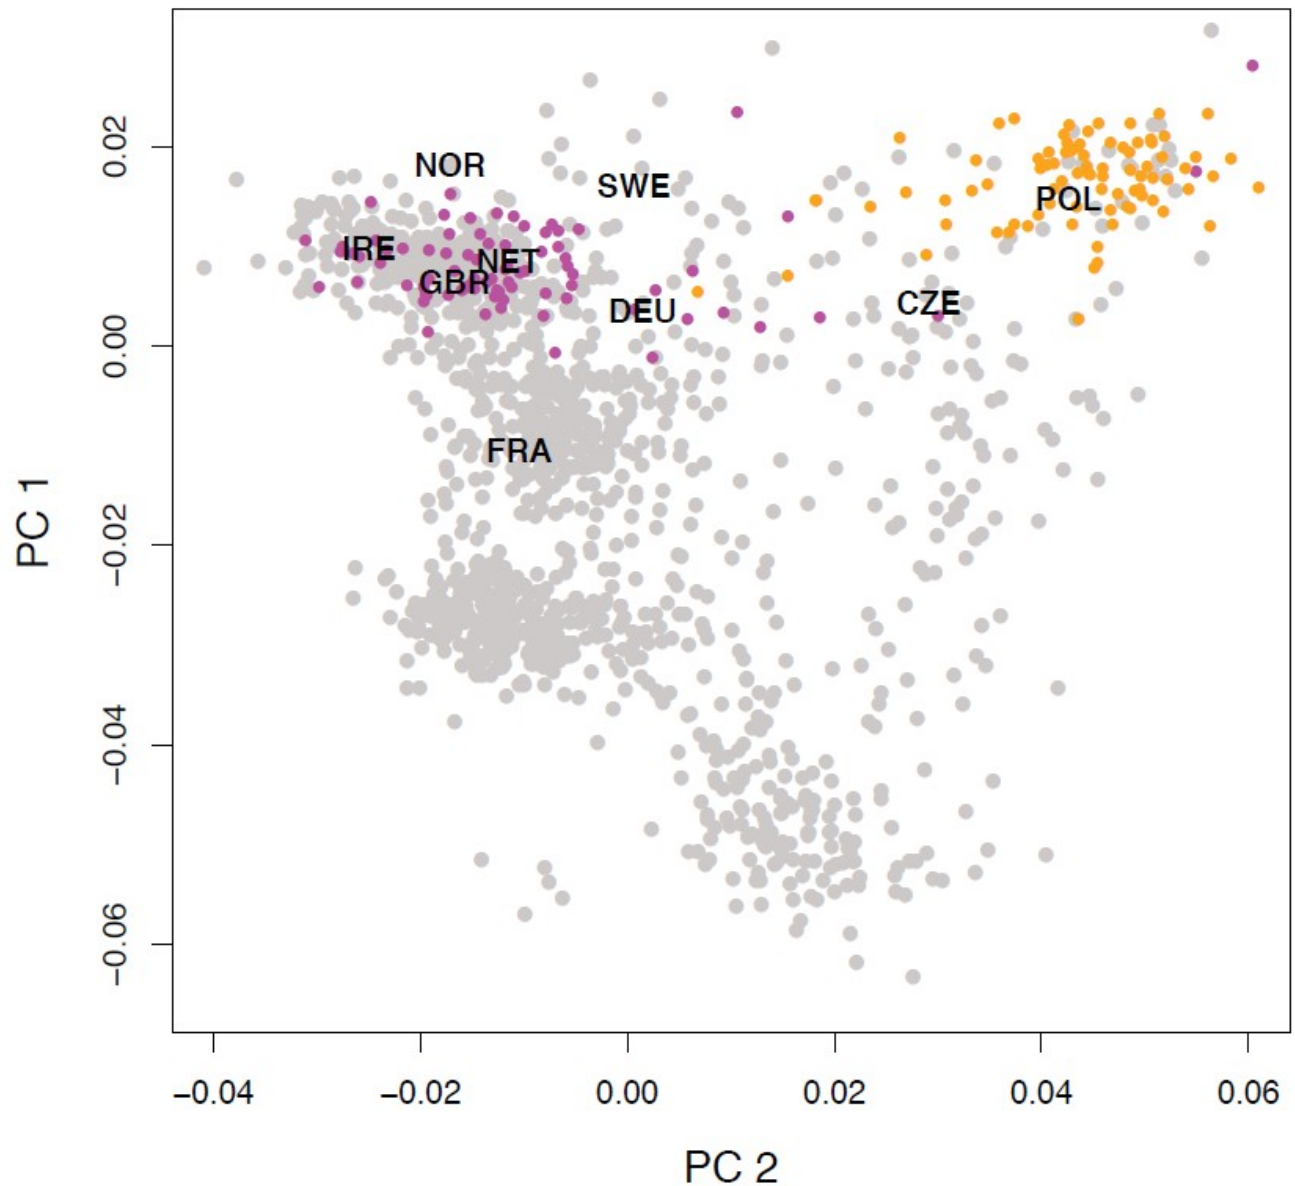

**Figure S3.** Self-reported ancestries of Wisconsinites (magenta: insular English ancestry reported; orange: insular Polish ancestry reported) form mostly concentrated clusters in appropriate positions upon the underlying map of Europe (gray circles). However, a number of visually obvious outliers are present and separation between Northwestern European countries is minimal. Bold face country codes mark the mean positions of Europeans sampled from those countries (IRE: Ireland; GBR: England; FRA: France; NET: Netherlands; NOR: Norway; SWE: Sweden; DEU: Germany; CZE: Czech Republic; POL: Poland).

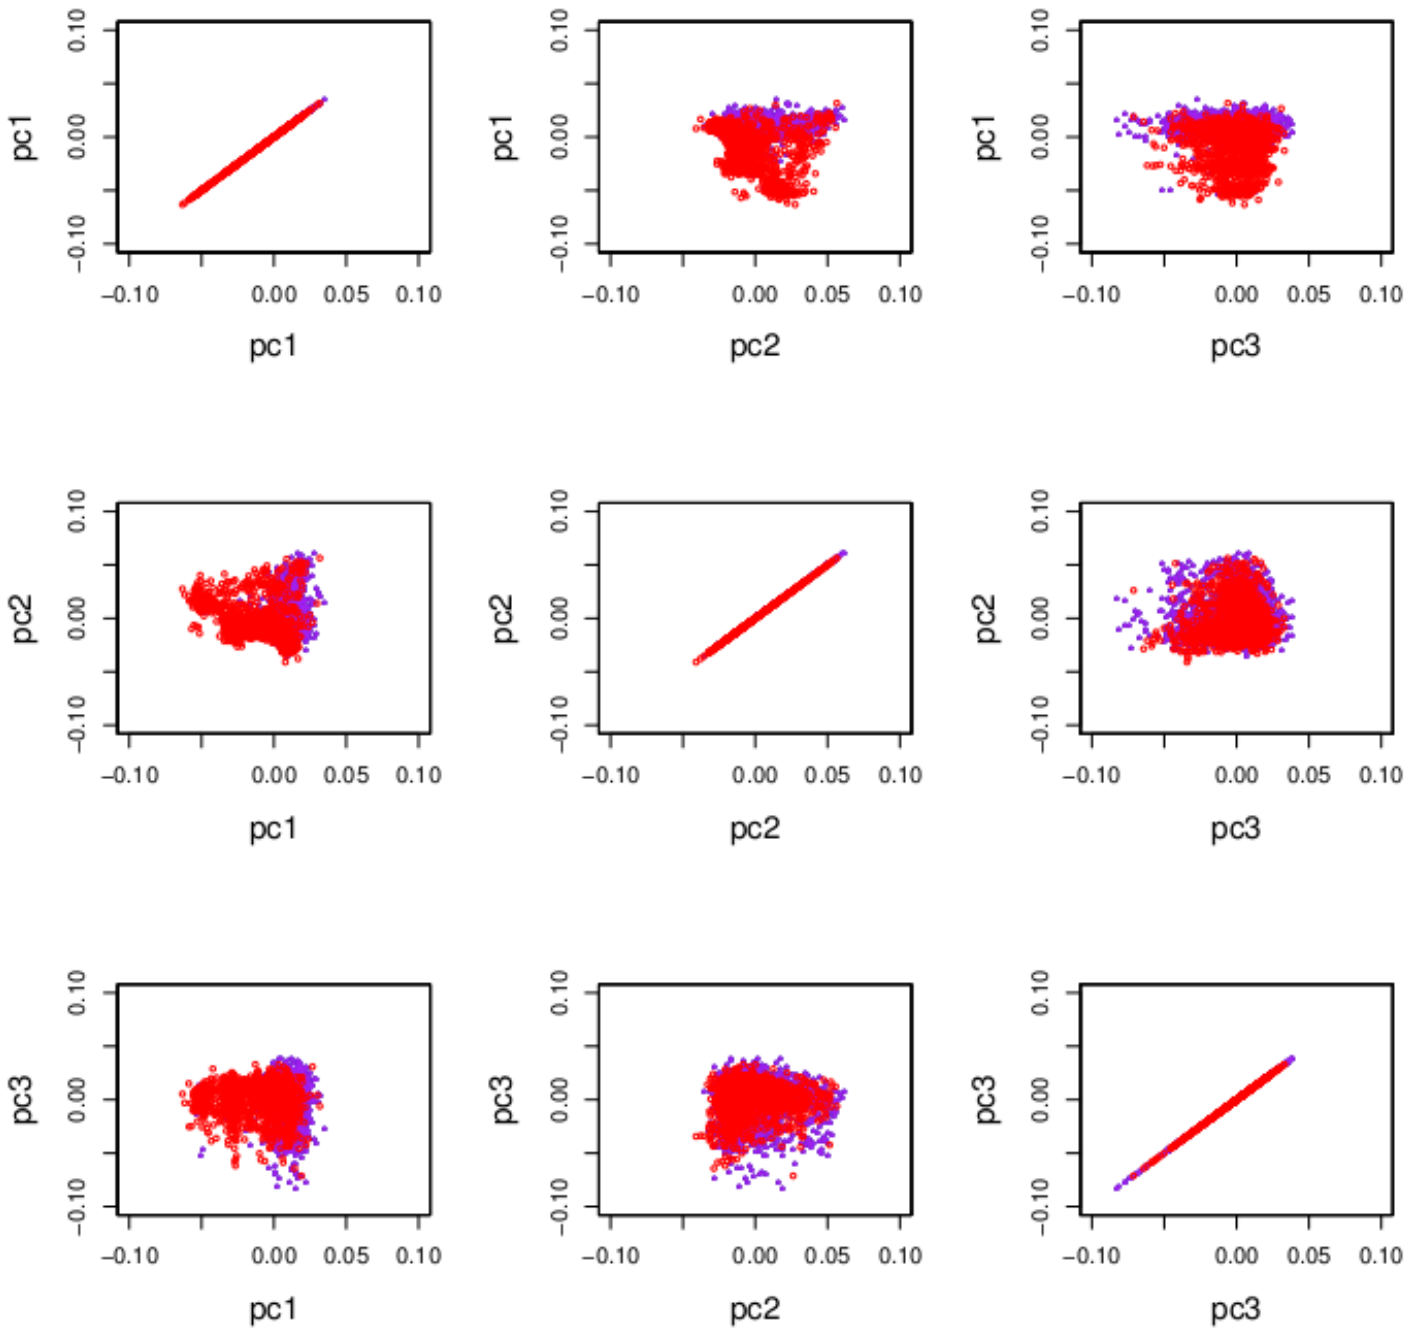

**Figure S4.** Results from combined PCA; biplots of PCs 1-3. Purple circles:  $\text{PMRP}_{\text{abbreviated}}$  individuals; red circles:  $\text{POPRES}_{\text{europe}}$  individuals. Higher dispersion of PMRP individuals is not evident in these plots as it is with higher-order PCs.

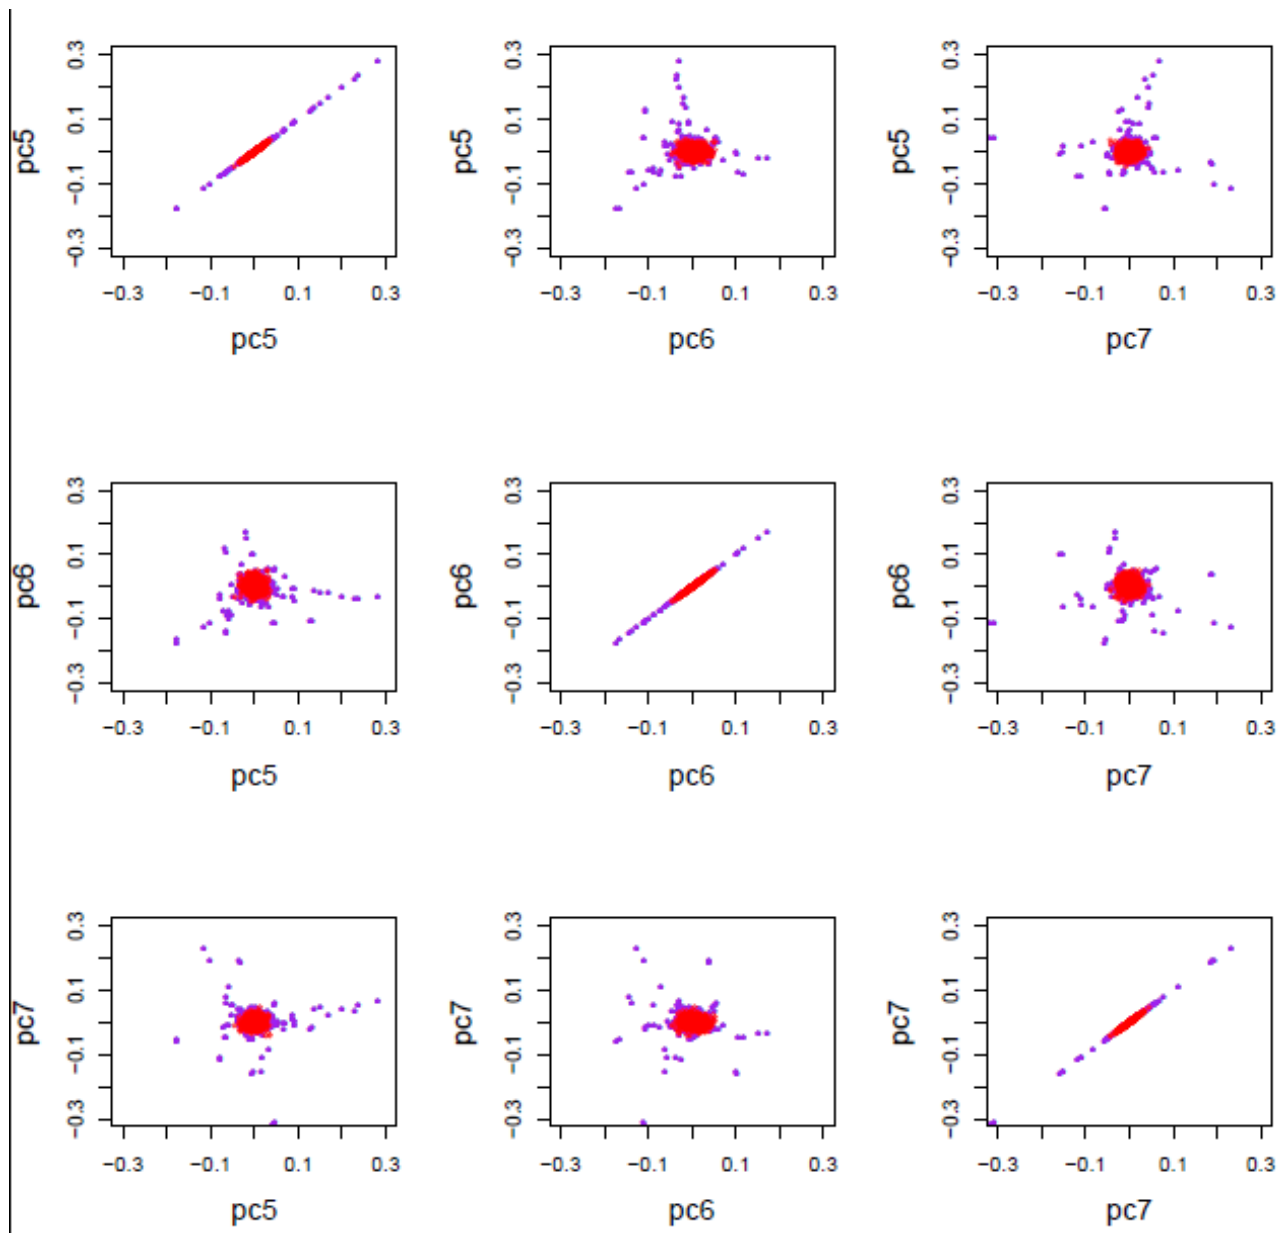

**Figure S5.** Results from combined PCA; biplots of PCs 4-7. Purple circles: PMRP<sub>abridged</sub> individuals; red circles: POPRES<sub>europe</sub> individuals.

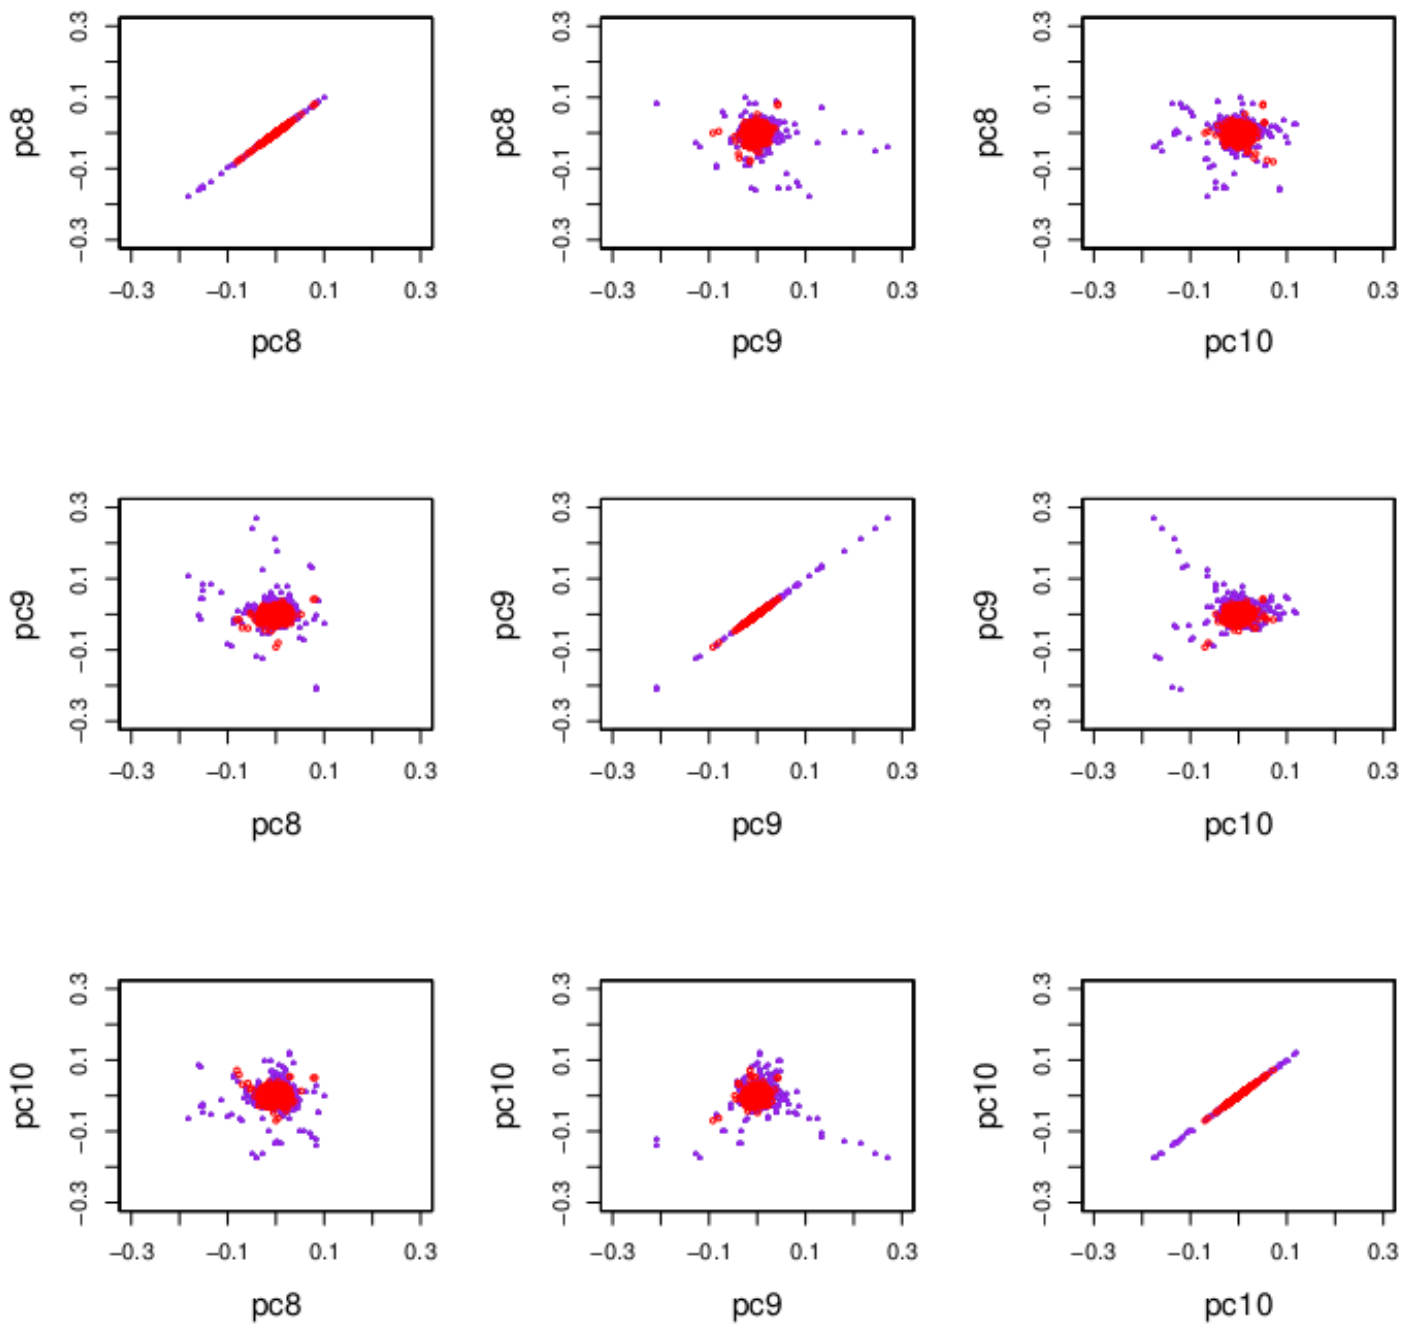

**Figure S6.** Results from combined PCA; biplots of PCs 8-10. Purple circles: PMRP<sub>abridged</sub> individuals; red circles: POPRES<sub>europa</sub> individuals.

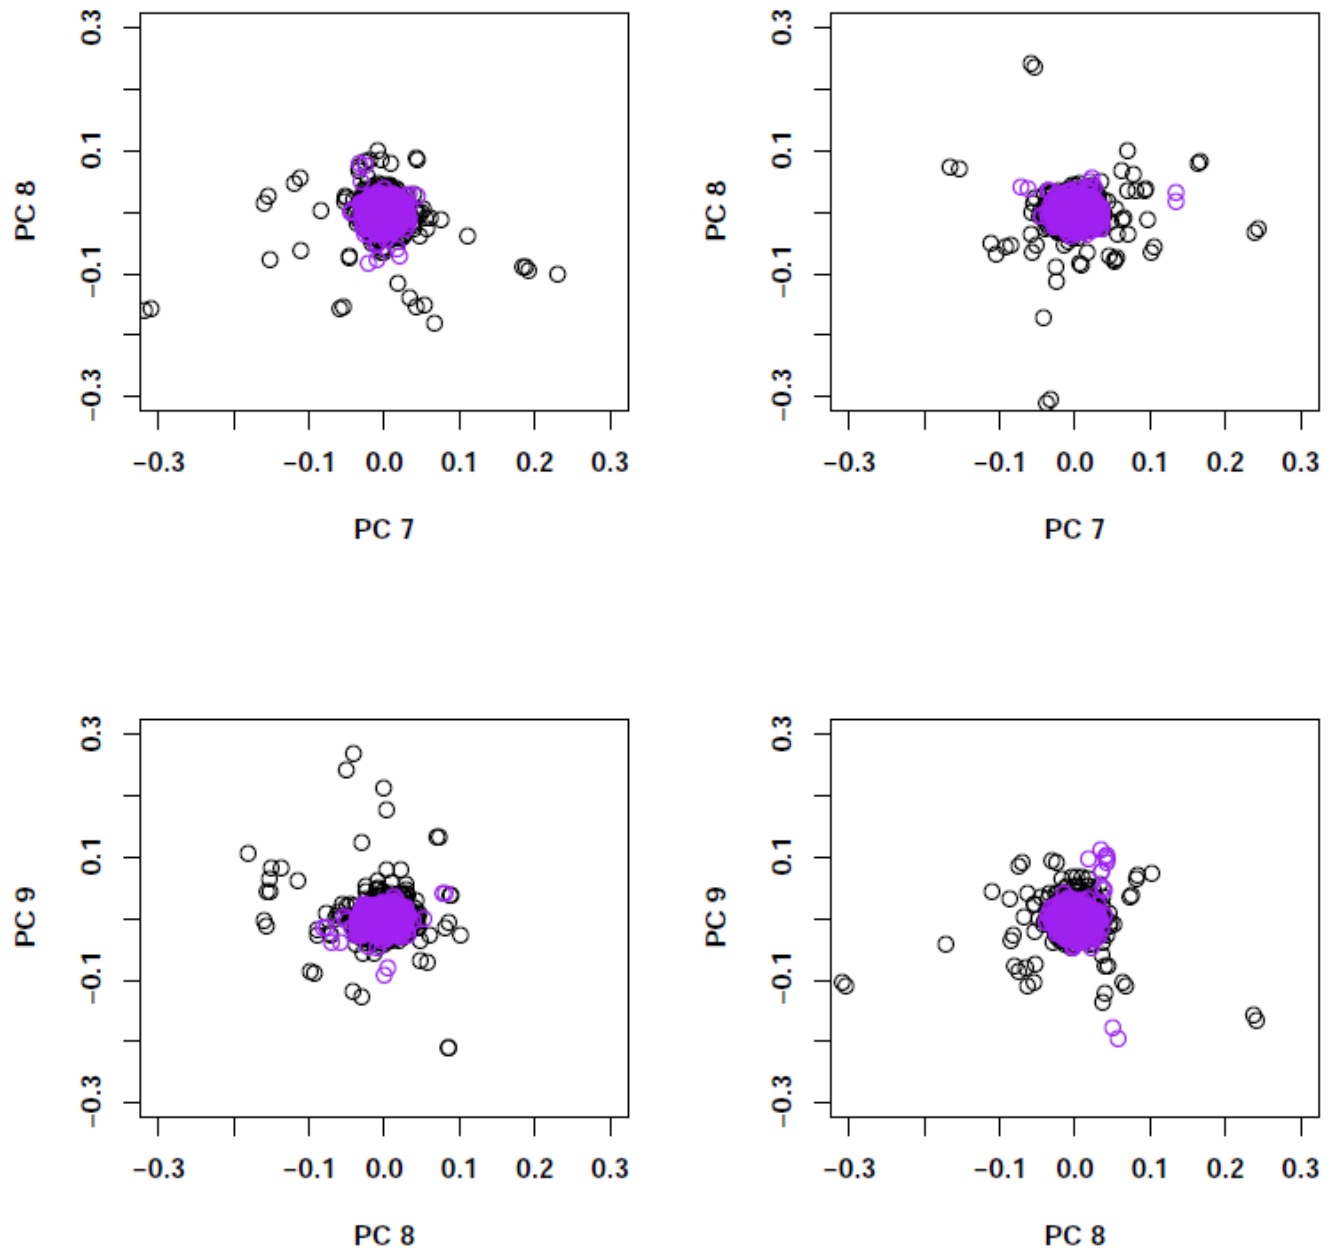

**Figure S7.** PC7/PC8 and PC8/PC9 biplots from analyses in which the original datasets (left-hand side) were used and analyses where each member of the PMRP dataset had a random 1861 genotypes deleted to equalize missing data rates (right-hand side). PMRP individuals are plotted in black while POPRES individuals are plotted in purple.

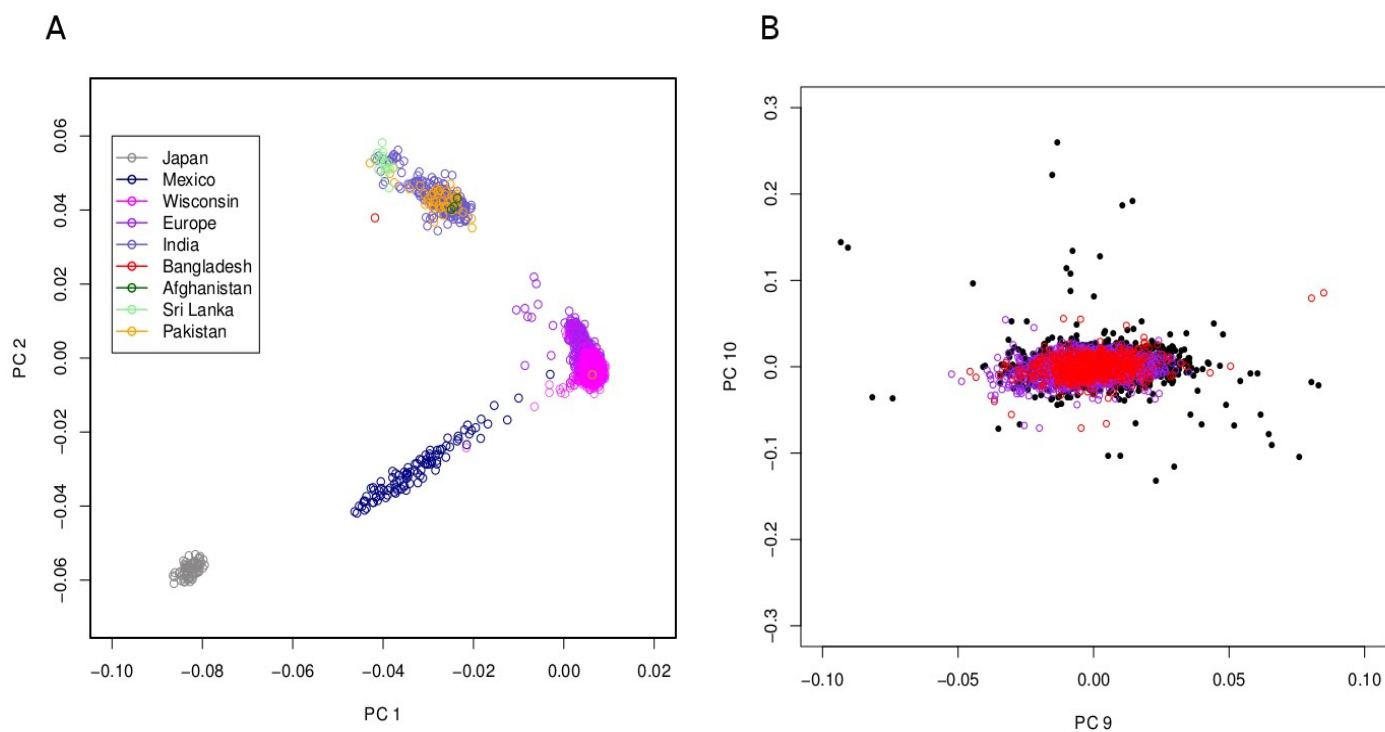

**Figure S8.** Results from combined PCA of  $\text{PMRP}_{\text{abridged}}$  +  $\text{POPRES}_{\text{europe}}$  + other samples from around the world. (A) On the PC1 / PC 2 biplot  $\text{PMRP}$  individuals (magenta circles) are coincident with and equally variable to Northern Europeans (purple circles). (B) On the PC 9 / PC 10 biplot,  $\text{PMRP}$  individuals show greater dispersion ( $\text{PMRP}_{\text{abridged}}$  :black circles;  $\text{POPRES}_{\text{europe}}$ : purple circles; elsewhere :red circles).

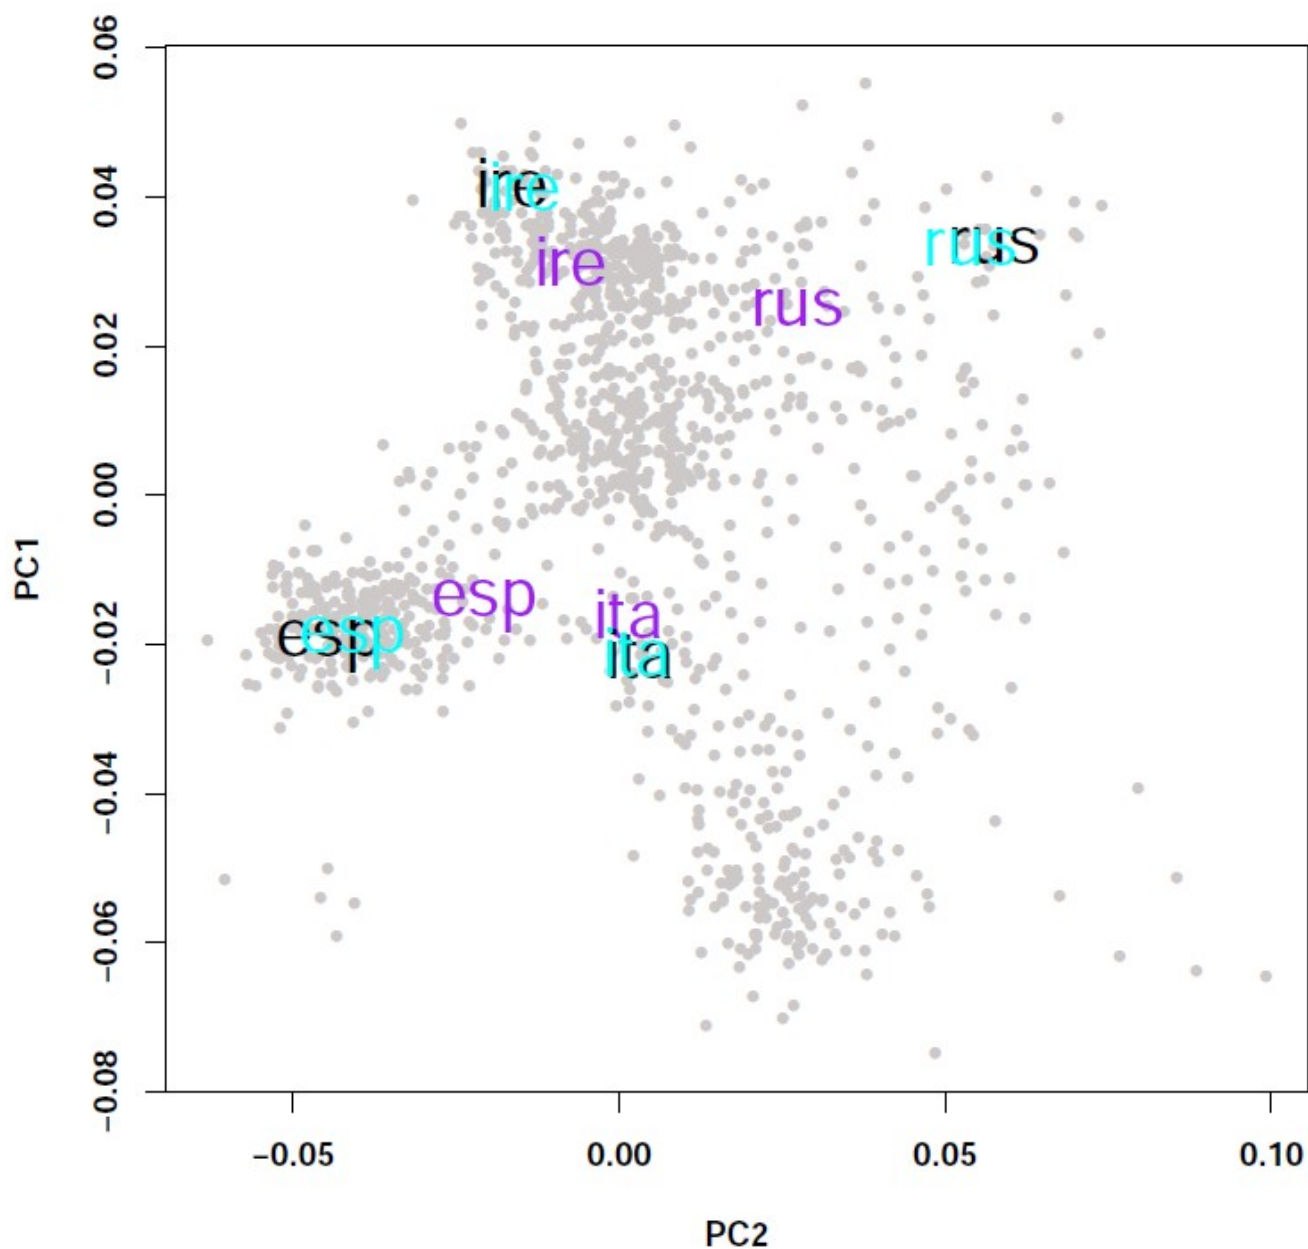

**Figure S9.** Demonstration of the efficacy of Lee et al's<sup>23</sup> projection bias correction. We performed PCA on POPRES<sub>europa</sub> alone, but left out four individuals who were projected to the top two PCs (one from Spain, ESP, one from Italy, ITA, one from Russia, RUS, and one from Ireland, IRE). Removal of these individuals did not affect the underlying map of Europe (gray dots). On the figure we plot the positions of the four individuals before bias correction (purple), after bias correction (cyan), and when included in combined PCA (black). As evidenced by the coincidence of cyan and black labels, bias correction largely removes the projection bias.



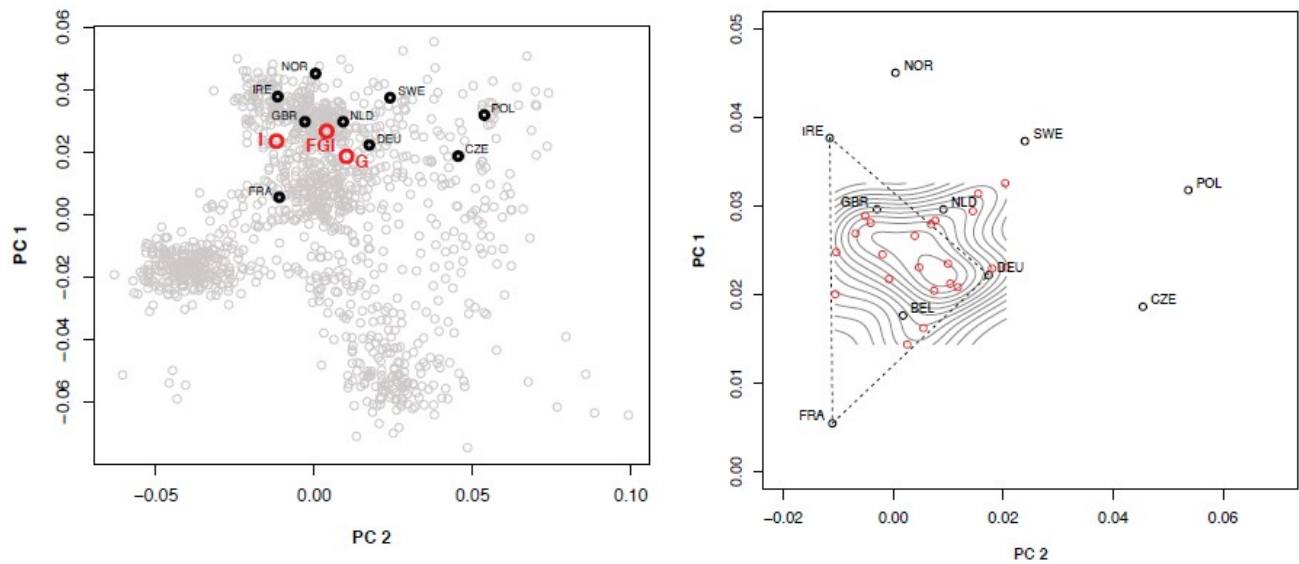

**Figure S10.** (left) A mother, father, and daughter from the PMRP sample (open, red circles) projected onto the map of European genetic distance. Open black circles mark the mean positions of individuals from the indicated countries in the  $\text{POPRES}_{\text{Europe}}$  dataset (abbreviations as in Fig. S2). The self-reported ancestry of the daughter (French, German, Irish) conflicts with those reported by her mother (Irish) and father (German). The position of the mother midway between the means of Ireland and France suggests she failed to report her French ancestry. (right) The distribution of  $\text{PMRP}_{\text{abridged}}$  individuals who self-reported French-German-Irish (FGI) ancestry. The underlying contour is a two-dimensional kernel density estimate of this distribution. Note that FGI individuals tend to fall within a triangle with the three source countries at its vertices, which places them closest to English and Belgian means.



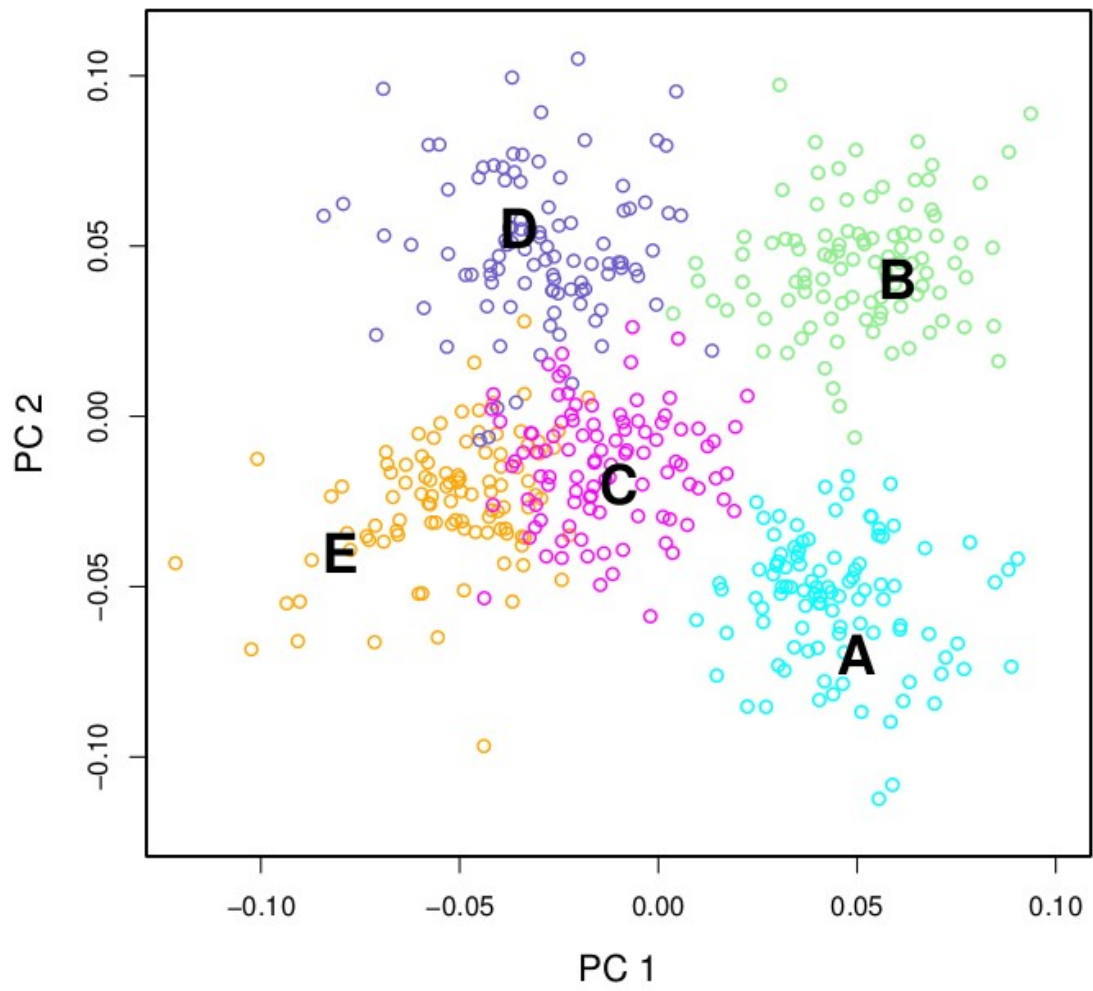

**Figure S12.** Results from PCA of the five simulated source populations.

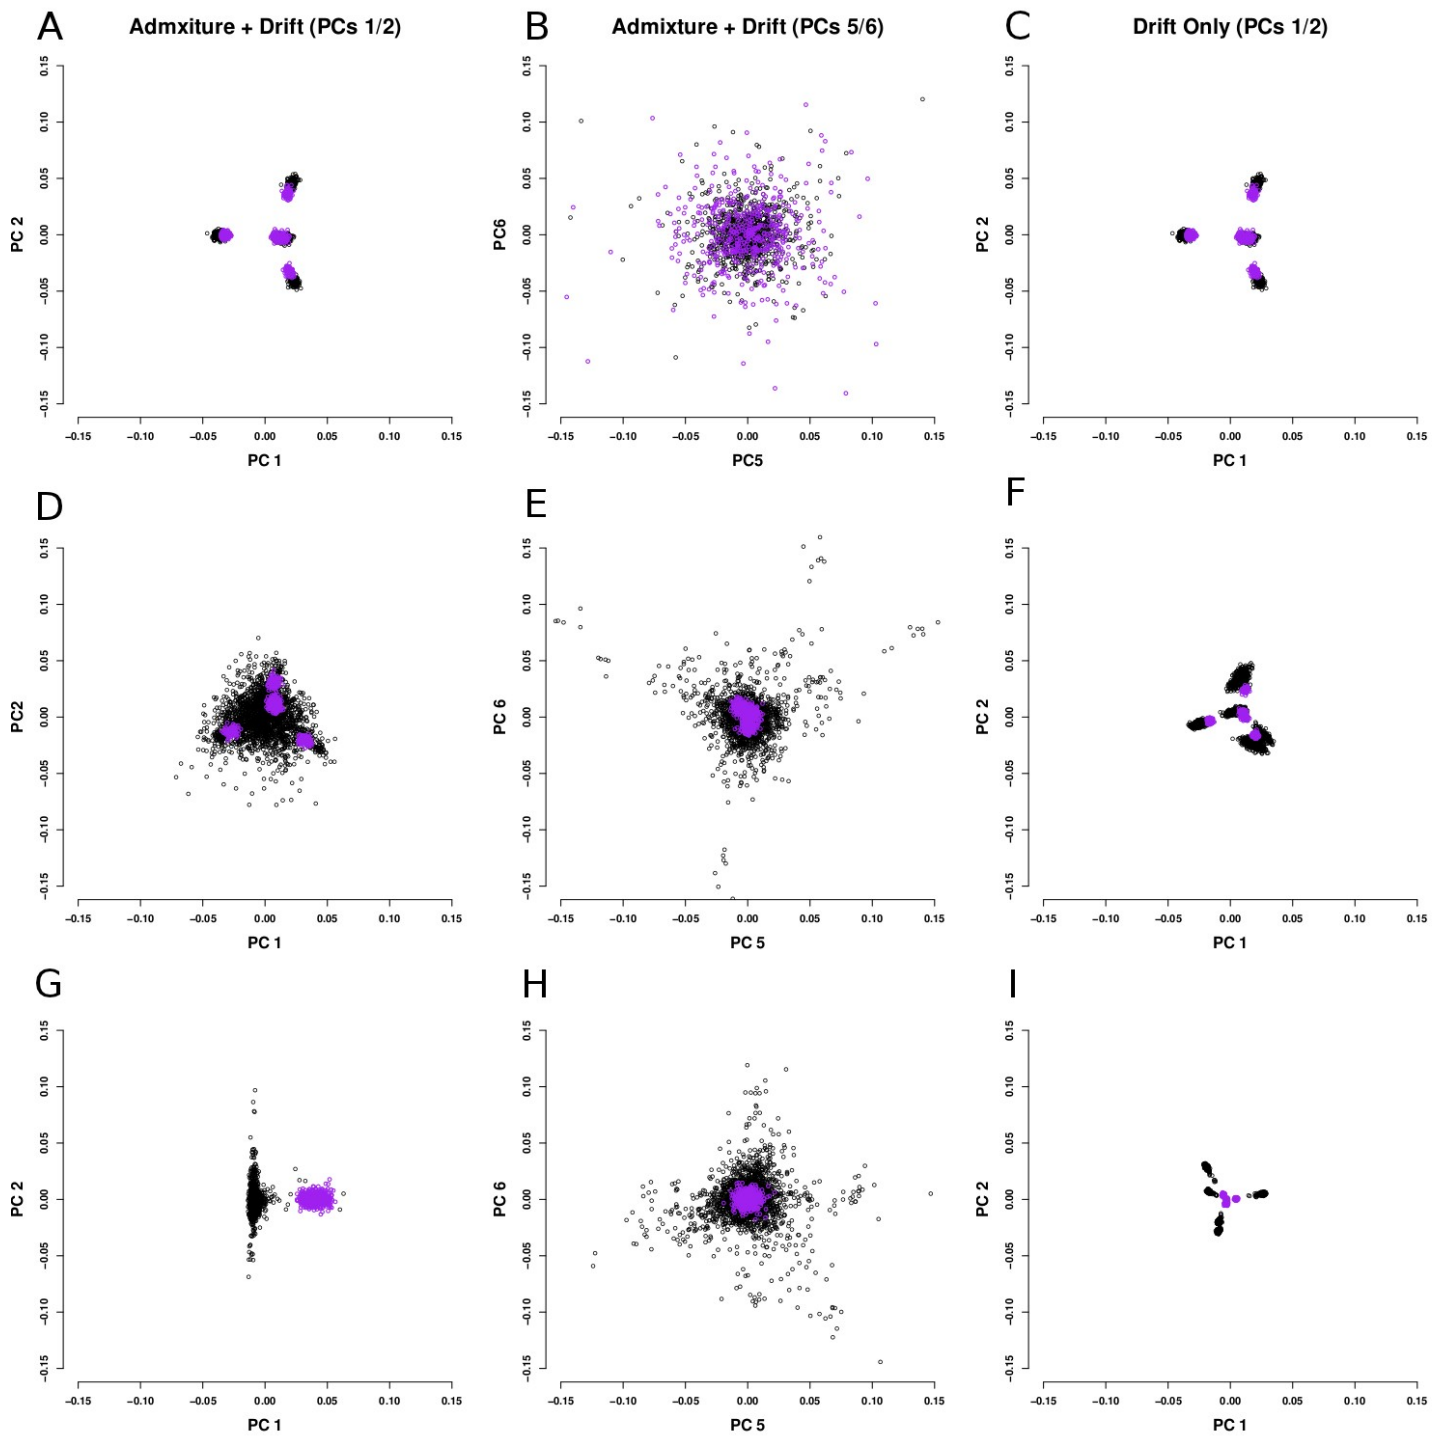

**Figure S13.** Results from combined PCA of simulated genotype data. Left and middle columns display results from the admixture plus drift scenario, while the right column displays results from the drift only scenario. Top row: initial colonization; middle row: 5 generations after colonization; bottom row: 40 generations after colonization. Purple dots are source individuals while black dots are sink individuals.

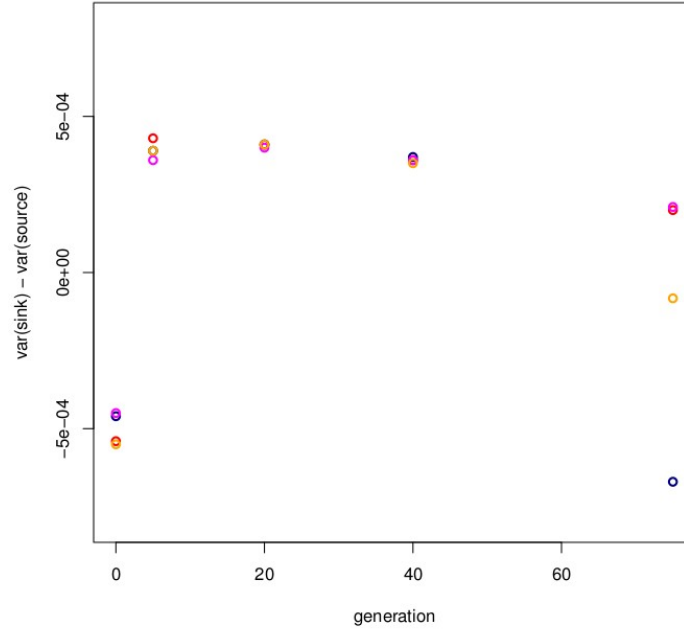

**Figure S14.** The metric  $dV_{PCx} = \text{var}(\text{sink}) - \text{var}(\text{source})$  is averaged across all five sink-source pairs in simulations of admixture and drift at generations 0, 20, 40, and 75 for PC5 (navy), PC6 (orange), PC7 (red), and PC8 (magenta). In each case,  $\text{var}(\cdot)$  is the variance of  $PC_x$  scores among individuals of the population in question. Likely due to founder effects,  $\text{var}(\text{source})$  is greater than  $\text{var}(\text{sink})$  at founding generation 0. However, by generation 5, the situation is reversed and  $dV_{PCx}$  remains positive for all sink-source pairs for many generations. This result suggests  $dV_{PCx}$  provides information regarding nascent divergence, which might be exploited in a permutation test wherein a null distribution of  $dV_{PCx}$  is obtained by permuting population labels thousands of times and recalculating  $dV_{PCx}$  each time. Further simulation would be required to determine the power of this test, which would likely be improved by including variance data from multiple higher-order PCs. A practical limitation to the suggested test is that *a priori* knowledge of potential source populations is required. Nevertheless, a simple test for nascent divergence should help both human and population geneticists characterize the recent history and genetic composition of focal populations.
